# Supplementary material for: In vitro inhibition of human red blood cell acetylcholinesterase (AChE) by temephos-oxidized products
Source: PubMed Central journal article supplement (PMC6791832; doi:10.1038/s41598-019-51261-2), 2019-10-14
Supplement: 41598_2019_51261_MOESM1_ESM.pdf [file 41598_2019_51261_MOESM1_ESM.pdf]

*In vitro* inhibition of human red blood cell acetylcholinesterase (AChE) by temephos-oxidized products

Francisco Alberto Verdín-Betancourt<sup>1</sup>, Mario Figueroa<sup>2</sup>, María de Lourdes López-González<sup>1</sup>, Elizabeth Gómez<sup>3</sup>,  
Yael Yvette Bernal-Hernández<sup>4</sup>, Aurora Elizabeth Rojas-García<sup>4</sup>, and Adolfo Sierra-Santoyo<sup>1,\*</sup>

<sup>1</sup>Departamento de Toxicología, Centro de Investigación y de Estudios Avanzados del Instituto Politécnico Nacional, Col. San Pedro Zacatenco, Ciudad de México C.P. 07360, México.

<sup>2</sup>Facultad de Química and <sup>3</sup>Instituto de Química, Universidad Nacional Autónoma de México, Ciudad de México 04510, México.

<sup>4</sup>Laboratorio de Contaminación y Toxicología Ambiental, Universidad Autónoma de Nayarit, Tepic, Nayarit 63155, México.

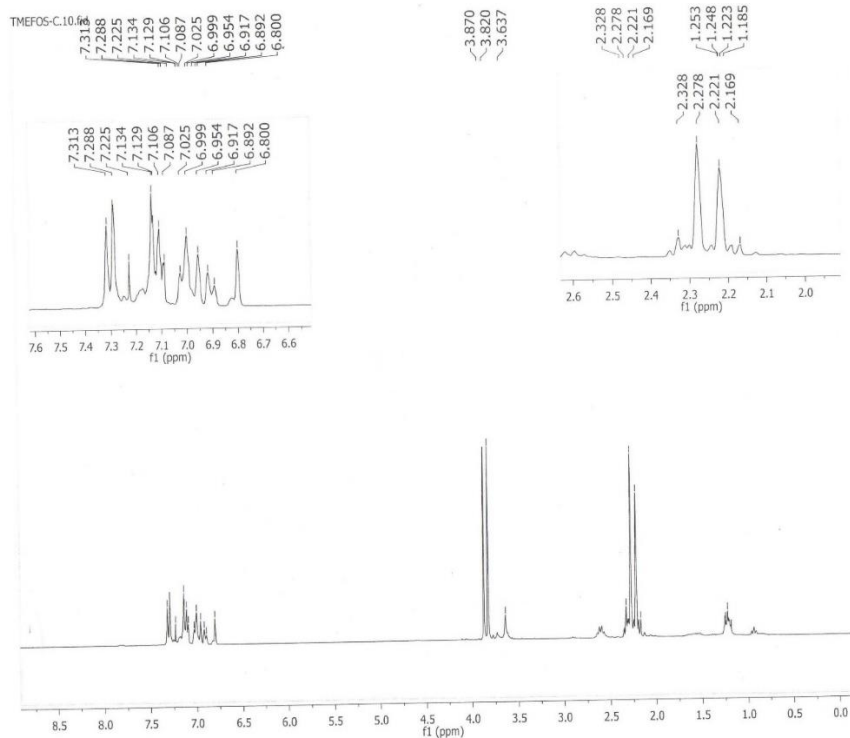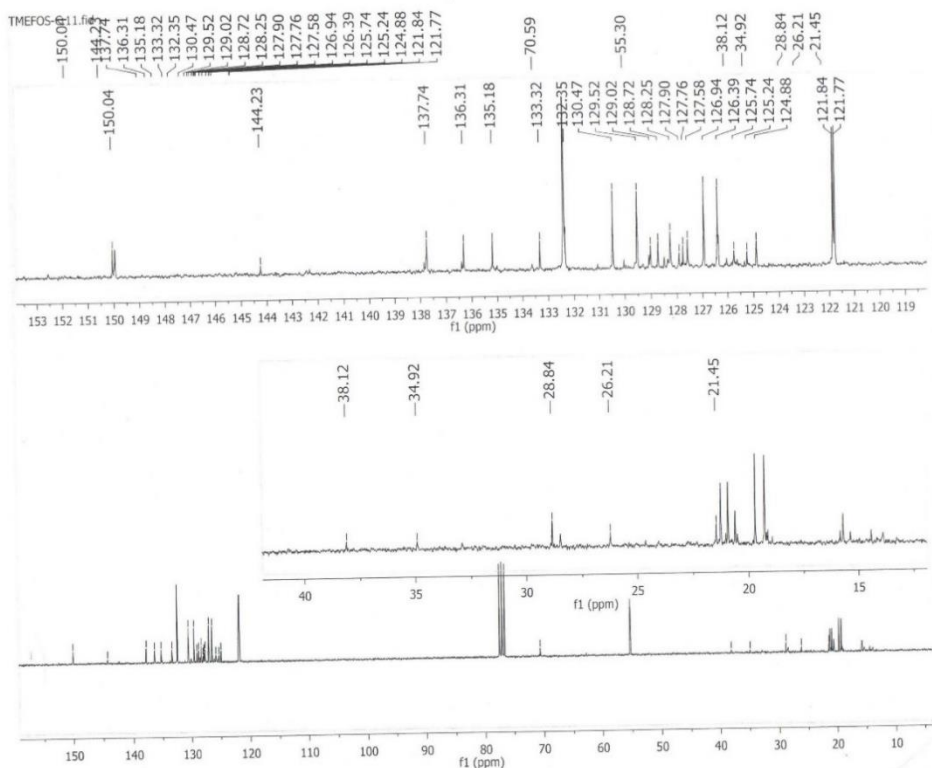

**Online Resource 1.** <sup>1</sup>H (300 MHz; top) and <sup>13</sup>C (75 MHz; bottom) NMR spectra of T.M.FOS® 500 CE in CDCl<sub>3</sub>.

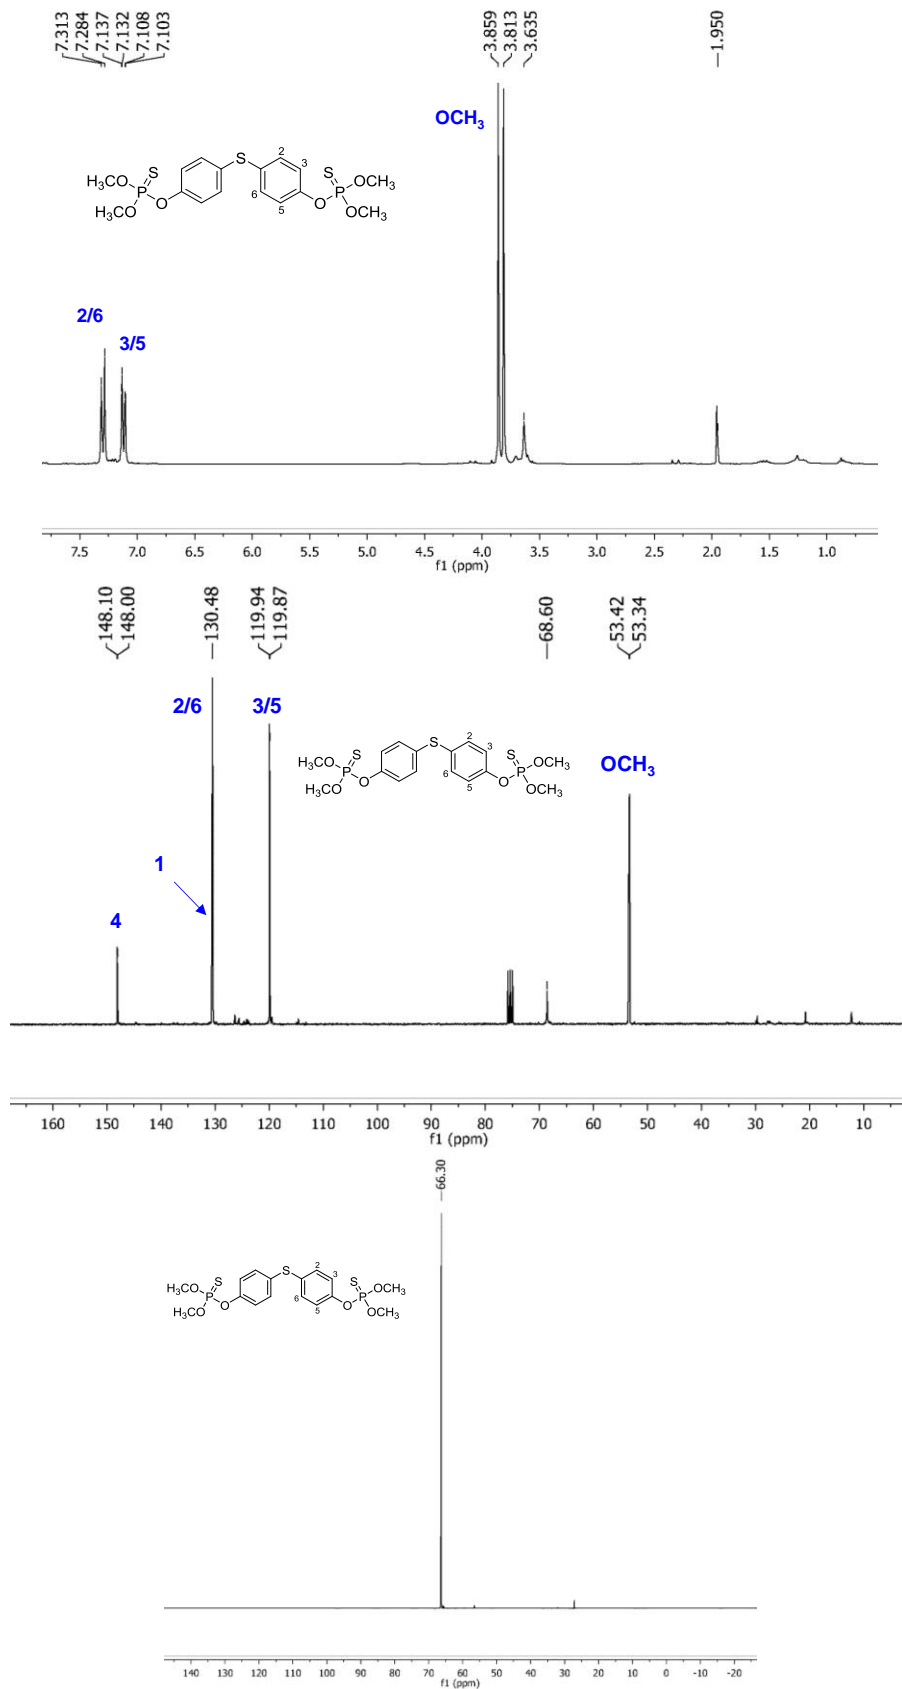

**Online Resource 2.** <sup>1</sup>H (300 MHz; top), <sup>13</sup>C (75 MHz; middle) and <sup>31</sup>P (121 MHz; bottom) NMR spectra of purified Tem in CDCl<sub>3</sub>.

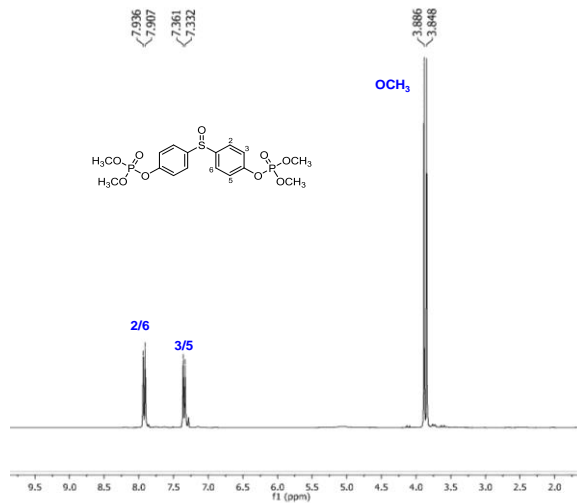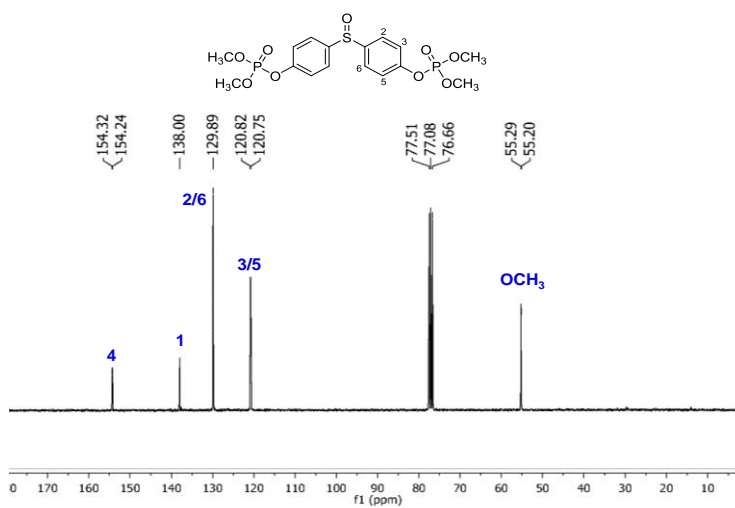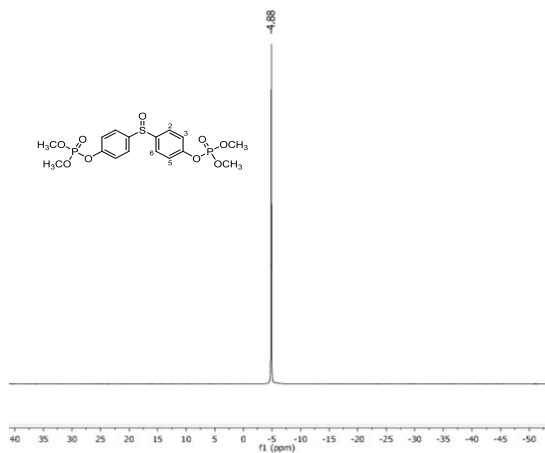

**Online Resource 3.** <sup>1</sup>H (300 MHz; top), <sup>13</sup>C (75 MHz; middle) and <sup>31</sup>P (121 MHz; bottom) NMR spectra of Tem-diox-SO in CDCl<sub>3</sub>.

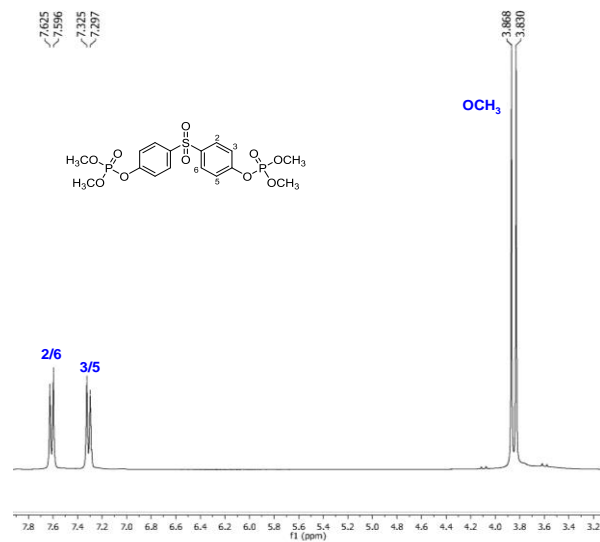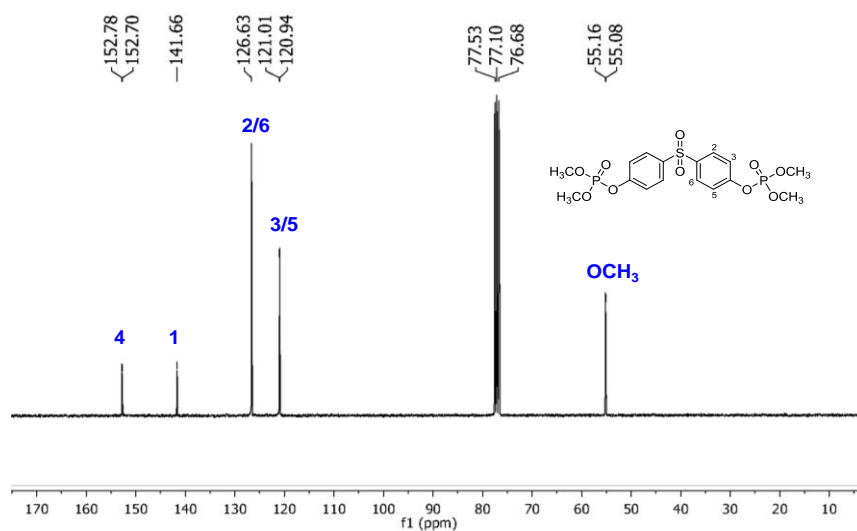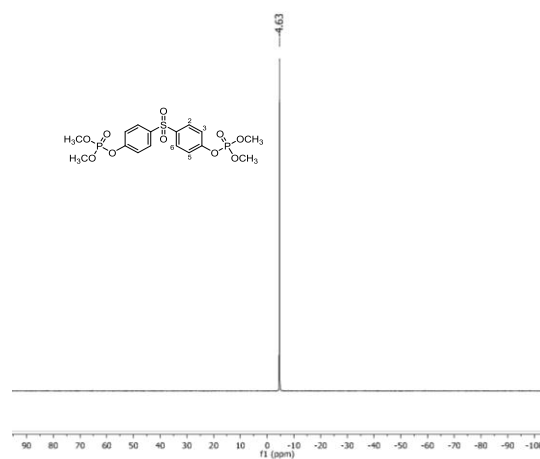

**Online Resource 4.** <sup>1</sup>H (300 MHz; top), <sup>13</sup>C (75 MHz; middle) and <sup>31</sup>P (121 MHz; bottom) NMR spectra of Tem-diox-SO<sub>2</sub> in CDCl<sub>3</sub>.

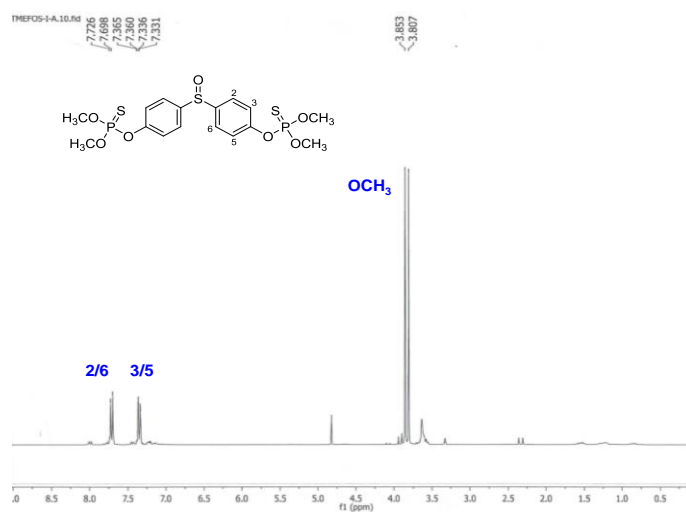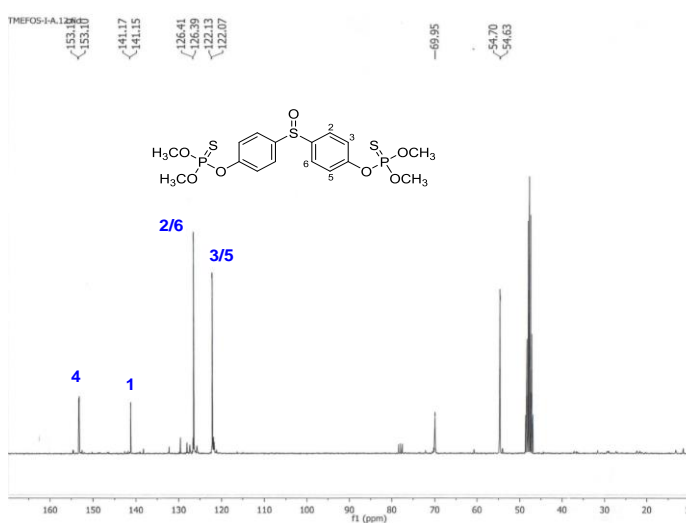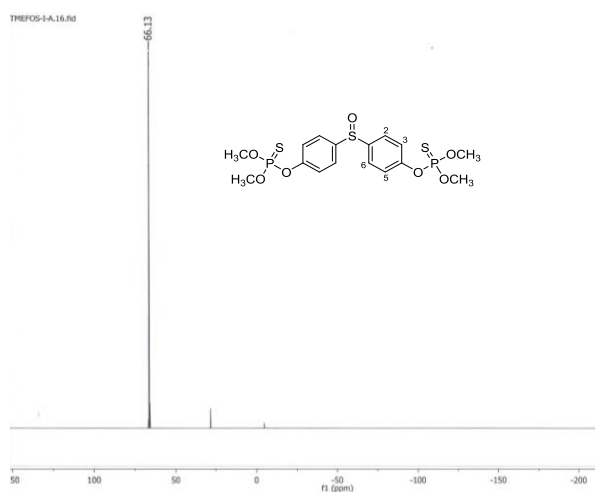

**Online Resource 5.**  $^1\text{H}$  (300 MHz; top),  $^{13}\text{C}$  (75 MHz; middle) and  $^{31}\text{P}$  (121 MHz; bottom) NMR spectra of Tem-SO in  $\text{MeOH-}d_4$ .

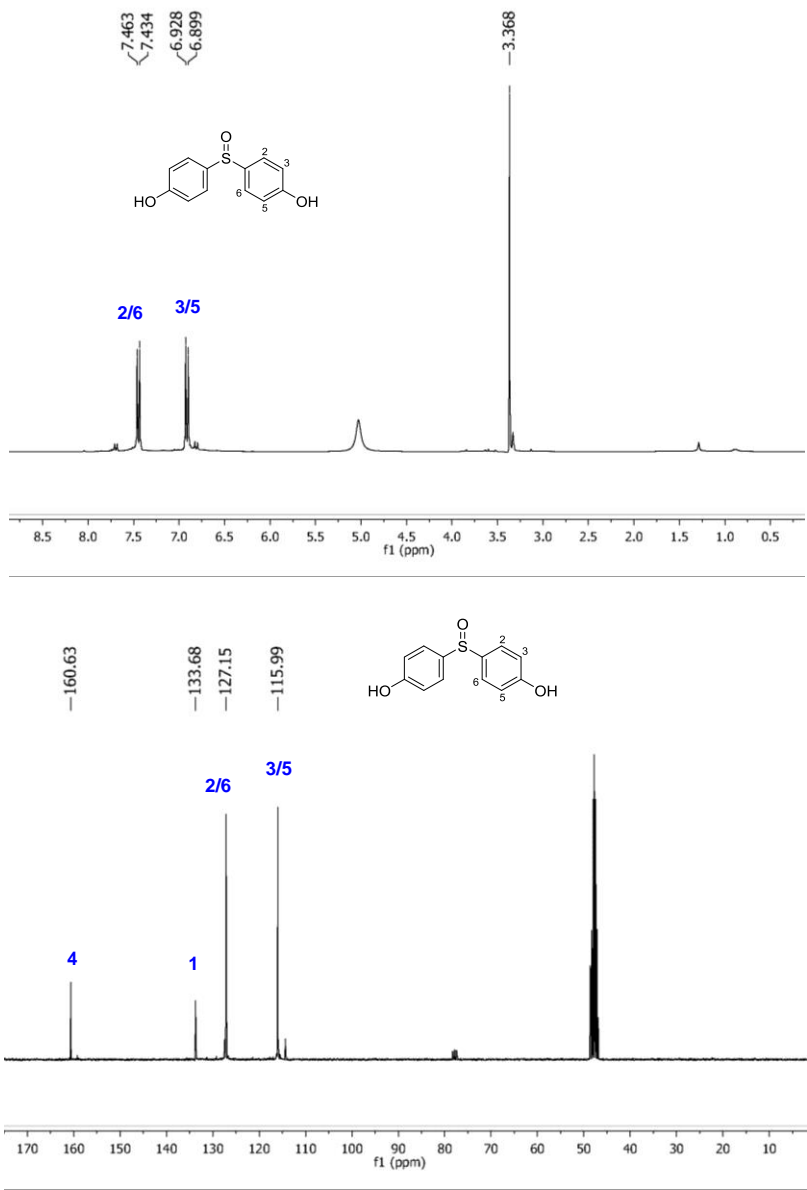

**Online Resource 6.** <sup>1</sup>H (300 MHz; top) and <sup>13</sup>C (75 MHz; bottom) NMR spectra of SIDP in MeOH-*d*<sub>4</sub>.

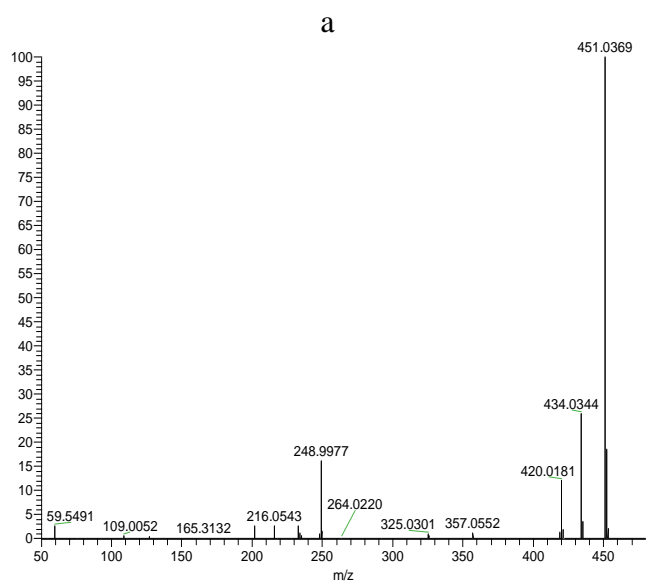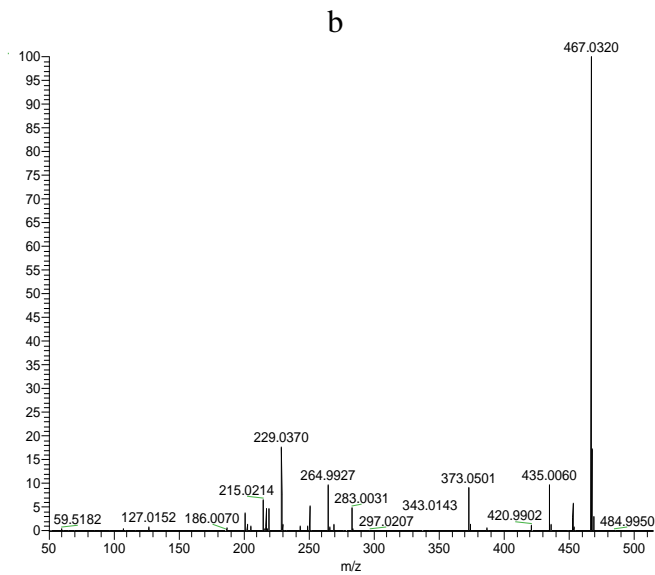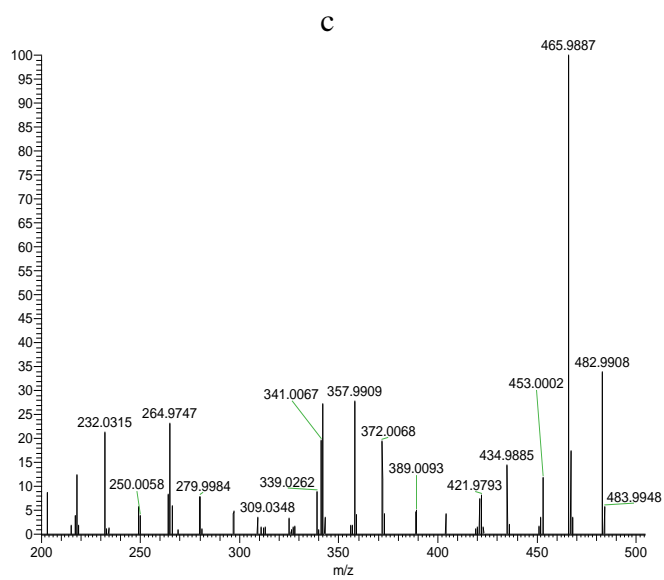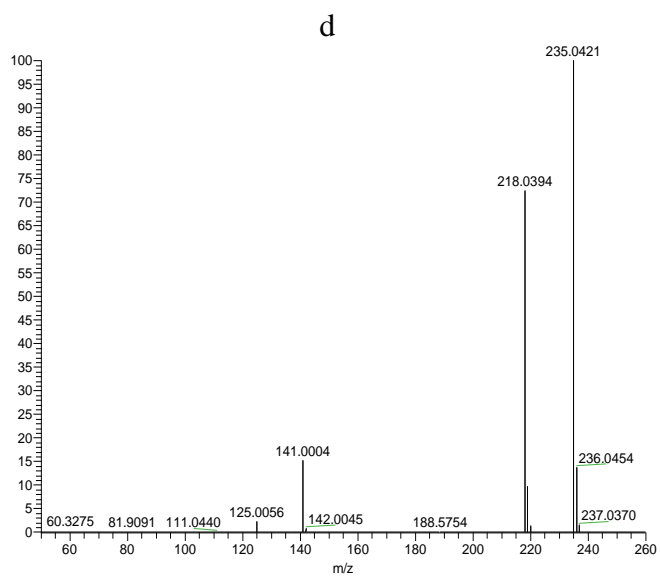

**Online Resource 7.** HRESIMS (positive mode) spectra of a) Tem-dox-SO, b) Tem-dox-SO<sub>2</sub>, c) Tem-SO, and d) SIDP.



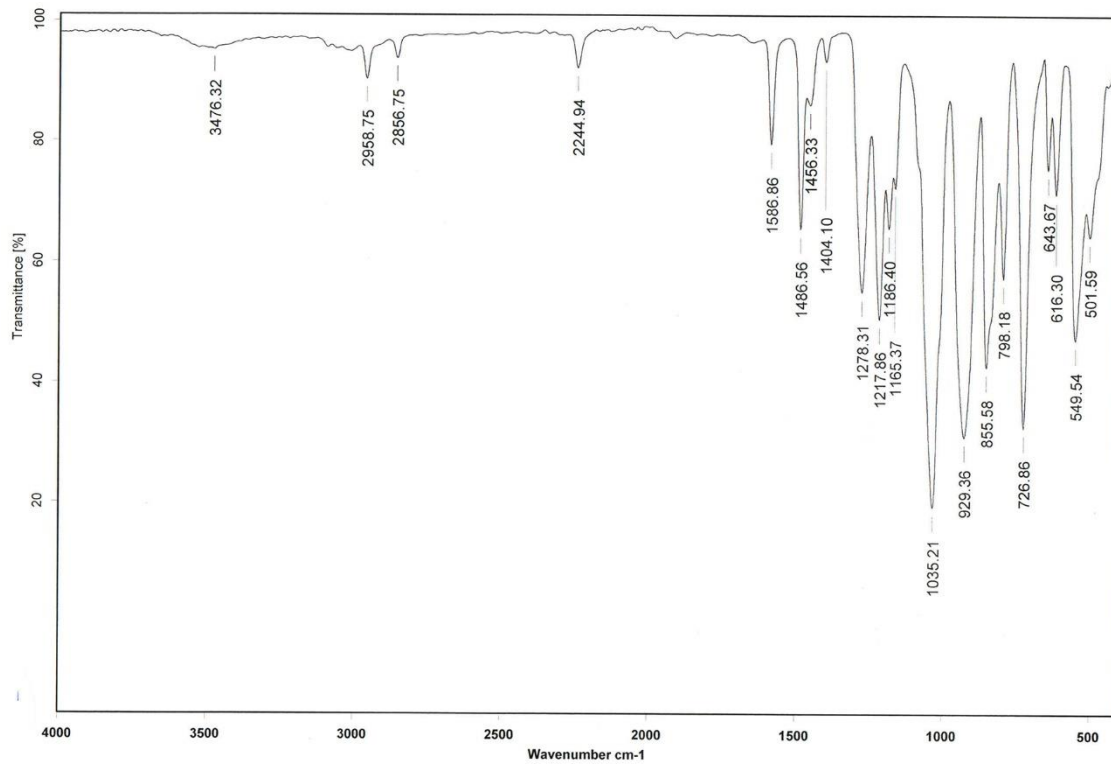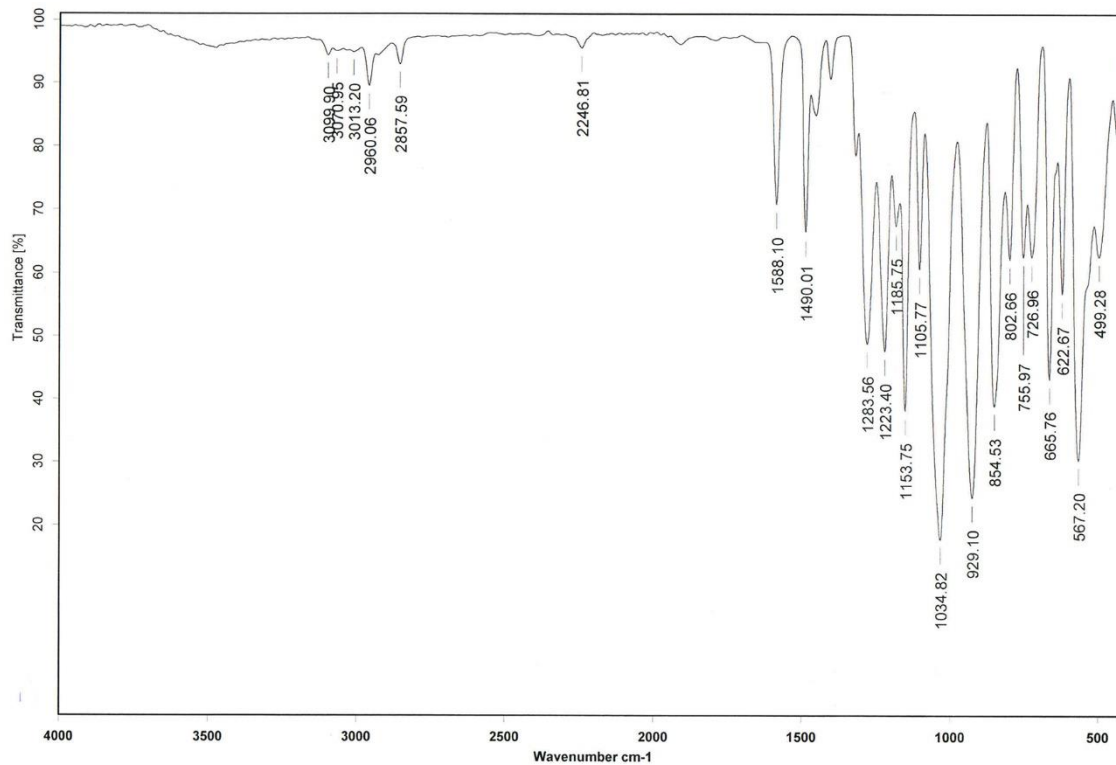

**Online Resource 8.** FTIR spectrum of Tem-dox-SO (top) and Tem-dox-SO<sub>2</sub> (bottom).

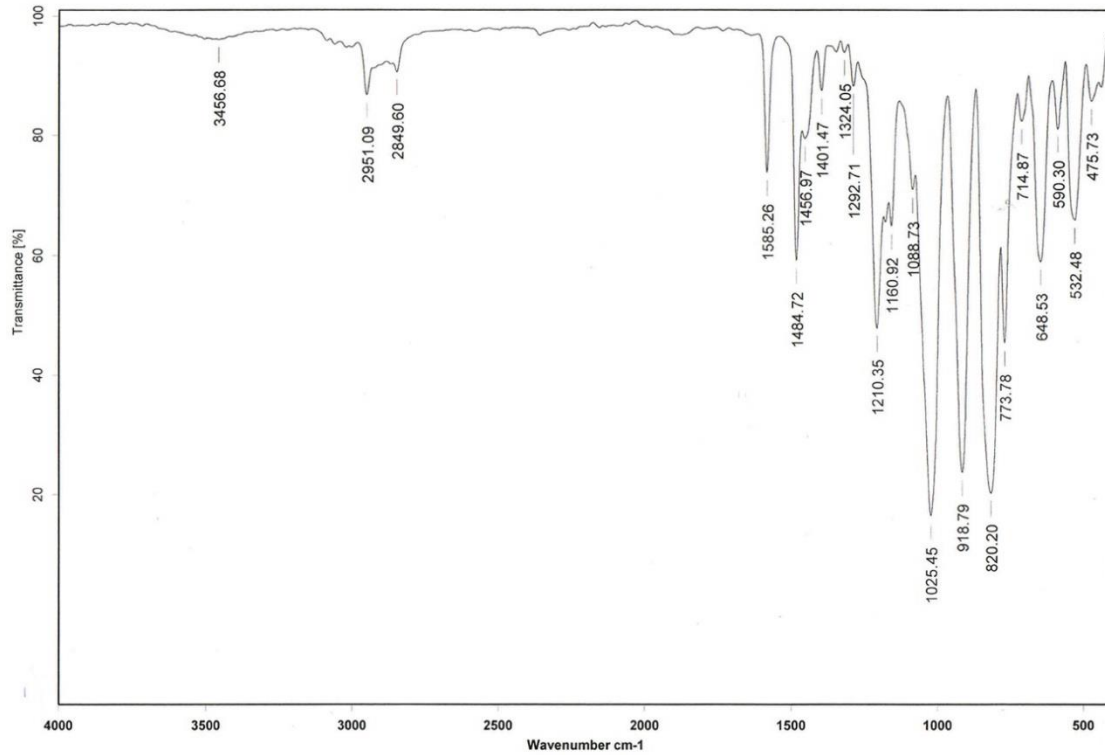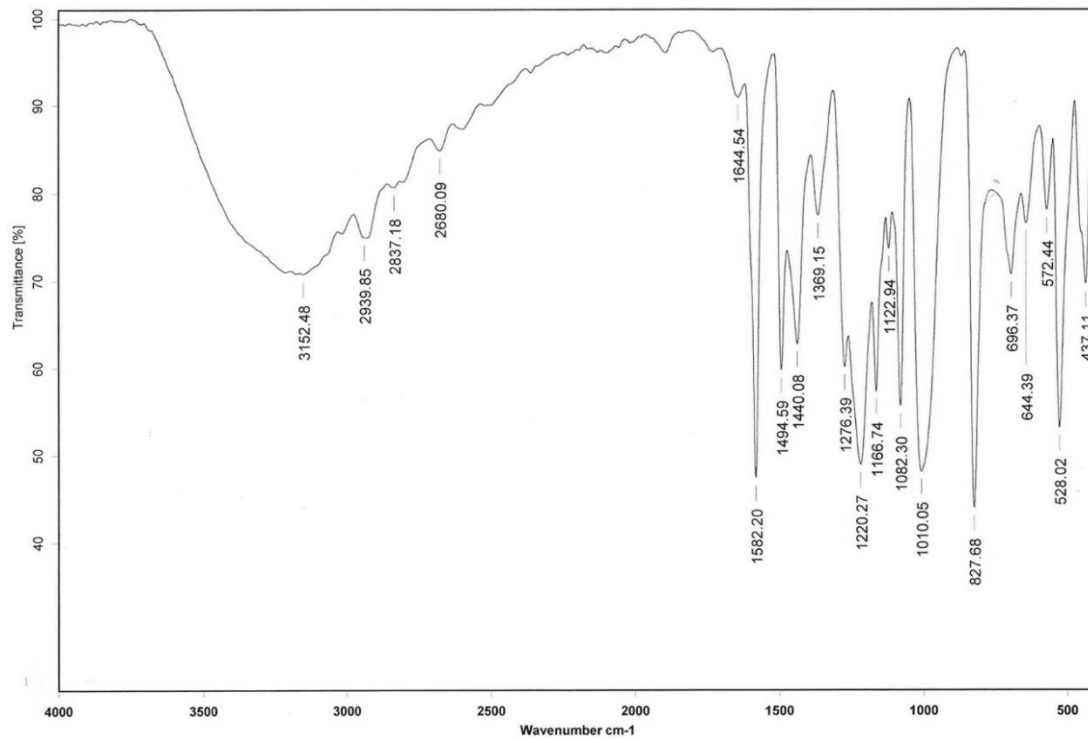

**Online Resource 9.** FTIR spectrum of Tem-SO (top) and SIDP (bottom).
